# QTL Analysis for Grain Quality Traits in 2 BC<sub>2</sub>F<sub>2</sub> Populations Derived from Crosses between *Oryza sativa* cv Swarna and 2 Accessions of *O. nivara*

B. P. MALLIKARJUNA SWAMY, K. KALADHAR, N. SHOBHA RANI, G. S. V. PRASAD, B. C. VIRAKTAMATH, G. ASHOK REDDY, AND N. SARLA

From the Directorate of Rice Research, Rajendranagar, Hyderabad 500030, Andhra Pradesh, India (Mallikarjuna, Swamy, Kaladhar, Shobha Rani, Prasad, Viraktamath, Ashok Reddy, and Sarla). B. P. Mallikarjuna Swamy is now at the Plant Breeding, Genetics and Biotechnology Division, International Rice Research Institute, DAPO Box 7777, Metro Manila, Philippines.

Address correspondence to B. P. Mallikarjuna Swamy at the address above, or e-mail: m.swamy@irri.org.

## Abstract

The appearance and cooking quality of rice determine its acceptability and price to a large extent. Quantitative trait loci (QTLs) for 12 grain quality traits were mapped in 2 mapping populations derived from *Oryza sativa* cv Swarna × *O. nivara*. The BC<sub>2</sub>F<sub>2</sub> population of the cross Swarna × *O. nivara* IRGC81848 (population 1) was evaluated during 2005 and that from Swarna × *O. nivara* IRGC81832 (population 2) was evaluated during 2006. Linkage maps were constructed using 100 simple sequence repeat (SSR) markers in population 1 and 75 SSR markers in population 2. In all, 21 QTLs were identified in population 1 (43% from *O. nivara*) and 37 in population 2 (38% QTLs from *O. nivara*). The location of *O. nivara*-derived QTLs mp1.2 for milling percent, kw6.1 for kernel width, and klac12.1 for kernel length after cooking coincided in the 2 populations and appear to be useful for Marker Assisted Selection (MAS). Four QTLs for milling percent, 1 QTL each for amylose content, water uptake, elongation ratio, 2 QTLs for kernel width, and 3 QTLs for gel consistency, each explained more than 20% phenotypic variance. Three QTL clusters for grain quality traits were close to the genes/QTLs for shattering and seed dormancy. QTLs for 4 quality traits were associated with 5 of the 7 major yield QTLs reported in the same 2 mapping populations. Useful introgression lines have been developed for several agronomic traits. It emerges that 40% *O. nivara* alleles were trait enhancing in both populations, and QTLs for grain quality overlapped with yield meta-QTLs and QTLs for dormancy and seed shattering.

**Key words:** *ac*, cooking quality, *gc*, grain quality, *gt*, *O. nivara*, *O. sativa*, QTLs, transgressive segregation

Rice grain yield needs to be continuously increased for food security as rice is the most important staple food, but grain quality is increasingly becoming important from the commercial point of view. The consumer preference for rice is determined mainly by appearance and cooking–eating qualities. In addition, processing qualities such as milling percent (mp) and head rice recovery (hrr) impact the market value (Rodante et al. 2009; Hao et al. 2010; Samuel et al. 2010; Nelson et al. 2011). Nutritional quality is also gaining importance. Appearance is specified by kernel length (kl), width (kw), length–width ratio (lbr), color, and translucency of polished grains. The cooking and eating qualities are reported to be largely governed by amylose content (ac), gel consistency (gc), gelatinization temperature (gt or asv), and pasting

properties of starch. The other important traits influencing quality of cooked rice are kernel length after cooking (klac), volume expansion ratio (ver), elongation ratio (er), and water uptake (wup). Most of the quality traits are complex and follow quantitative inheritance with considerable influence of genotype, environment, and their interactions (Li et al. 2003; Zhou et al. 2003; Ge et al. 2005; Wang et al. 2007; Yongmei et al. 2007; Amarawathi et al. 2008; Zheng et al. 2008; Nelson et al. 2011). Obtaining the right combination of these traits by phenotype-based classical breeding is very difficult, time consuming, and laborious. However, several recent developments have increased our understanding of the genes, pathways, and molecular mechanisms determining over all quality traits in rice (Fitzgerald et al. 2009).

Mapping of quantitative trait loci (QTLs) for grain quality traits in rice is a forward genetic approach to dissect and use them in marker-assisted selection and also for gene discovery. In rice, many quality traits have been mapped and tagged in different genetic backgrounds using molecular markers (Tan et al. 1999; Aluko et al. 2004; Wan et al. 2006; Wang et al. 2007; Yongmei et al. 2007; Zheng et al. 2008; Zhou et al. 2009; Shao et al. 2010; Karim et al. 2011; Nelson et al. 2011). Several previous QTL mapping studies involving mapping populations obtained from intraspecific and interspecific crosses revealed that quality traits are quite complex, and several chromosomal locations are associated with the expression of a given phenotype. Redona and Mackill (1998) detected 2 QTLs for kl on chromosome 3, explaining 10.4% and 20.9% of the phenotypic variation (PV), respectively. Aluko et al. (2004) also mapped a QTL for grain length on chromosome 3, explaining 12.5% of the PV. Wan et al. (2006) fine mapped a QTL for grain length within a physical interval of 87.5 kb on chromosome 3. Amarawathi et al. (2008) mapped QTLs for grain length on chromosomes 1 and 7 explaining 10% and 7% PV. Bao et al. (2000) consistently detected a major QTL for ac near waxy locus in a doubled haploid population grown over 3 seasons. A QTL for ac located at RM3–RM217 on the short arm of chromosome 6 explained 39.6% of the PV (Amarawathi et al. 2008). Lanceras et al. (2000) reported an ac QTL on chromosome 5 with 58% PV and 4.48% additive effect. Aluko et al. (2004) reported ac QTL on chromosome 6 with a PV of 73% and had an additive effect of 2.6. Redona and Mackill (1998) mapped a major locus explaining 22% PV on chromosome 7. Tan et al. (2000) detected a QTL for grain width on chromosome 5 and a minor locus on chromosome 6 in 2 different populations. Jue et al. (2009) detected a pleiotropic main effect QTL on chromosome 3 influencing grain length, length and width ratio, and head rice ratio. A minor QTL qGL-7 with pleiotropic effects on grain length, grain width, and grain weight was identified in a Recombinant Inbred Lines (RIL) population (Bai et al. 2010). Shao et al. (2010) detected a grain length QTL GL-7 on chromosome 7 and narrowed it to a 278-kb region. Li et al. (2004) identified 2 QTLs, lwr3.1 from *Oryza sativa* and lwr12.1 from *O. glaberrima*, for length/width ratio. Some of these major effect QTLs can be used for marker-aided selection of target traits and/or exclusion of non-desirable traits in segregating populations. Marker-assisted selection has been successfully used to improve grain quality traits of a male sterile line and maintainer line widely used in hybrid rice breeding in China (Zhou et al. 2003; Jin et al. 2010) and to improve cooking quality traits in Myanmar rice cultivar Manawthukha (Myint et al. 2009).

Wild species may not be superior to cultivated rice varieties with respect to yield and grain quality traits. However, the hidden cryptic variations in the wild accessions and transgressive segregants that appear in the wide crosses provide an opportunity to further improve the yield and grain quality traits and to broaden the genetic base of the popular rice varieties. Most of the quality traits have

been mapped in intraspecific crosses. Very few wild species have been explored for mapping and use of quality traits. There are only 2 reports on mapping of QTLs for grain quality traits from *O. rufipogon* (Septiningsih et al. 2003; Yuan et al. 2010) and none using *O. nivara*.

*Oryza nivara* (Sharma et Shastri) is one of the immediate wild progenitors of Asian cultivated rice *O. sativa*. Even though it is wild, its seeds are collected and cooked for traditional days of fasting in many parts of India, indicating its nutritional value ([www.agri-history.org](http://www.agri-history.org)). The *O. nivara* accessions from different parts of India and abroad reveal abundant genetic diversity (Joshi et al. 2000; Sarla et al. 2003; Juneja et al. 2006) and are likely to have new alleles for improving grain quality traits.

Two accessions of *O. nivara* IRGC81848 (Uttar Pradesh) and IRGC81832 (Bihar) were used for developing mapping populations in the background of popular cultivated rice variety Swarna. These 2 accessions showed moderate molecular genetic diversity from Swarna, and the 2 states, where they belong to, have abundant genetic diversity for *O. nivara* accessions. The 2 accessions were also similar for grain quality traits, such as kw, lbr, asv, ac, and gc. However, the values were different for kl, klac, and er.

Two BC<sub>2</sub>F<sub>2</sub> populations were developed from crosses between *O. sativa* cv Swarna and 2 different accessions of *O. nivara*. The population derived from Swarna × IRGC81848 is designated as population 1 and the population derived from Swarna × IRGC81832 is designated as population 2. The BC<sub>2</sub>F<sub>3</sub> seeds from these 2 populations were used for mapping QTLs for grain quality traits. Population 1 and population 2 consisted of 140 and 146 BC<sub>2</sub>F<sub>3</sub> families, respectively.

The main objectives of the present study were to map QTLs for 12 grain quality traits in BC<sub>2</sub>F<sub>3</sub> seeds derived from 2 mapping populations, to know the proportion of trait-enhancing alleles that can be obtained from 2 *O. nivara* accessions and their coincidence in the 2 populations, and to know the colocation of QTLs for quality with QTLs mapped for yield and yield-related traits in the 2 *O. nivara*-derived populations.

## Materials and Methods

### Plant Material

The 2 accessions of *O. nivara* used were obtained from IRRI but collected from Uttar Pradesh (IRGC81848) and Bihar (IRGC81832), 2 Northern States of India. These 2 wild accessions are quite diverse from other accessions of *O. nivara* from 9 other States in India (Sarla et al. 2003). The popular rainfed lowland rice cultivar Swarna was used as the recipient. An advanced backcross strategy as described by Thomson et al. (2003) was followed to develop 2 mapping populations. Crosses were made using *O. nivara* accessions as a male parent and Swarna as a female parent to generate F<sub>1</sub>s. BC<sub>1</sub>F<sub>1</sub>s and BC<sub>2</sub>F<sub>1</sub>s were generated using Swarna as a male parent. BC<sub>2</sub>F<sub>2</sub> families were developed by selfing BC<sub>2</sub>F<sub>1</sub>s. Two mapping populations, population 1 (Swarna × IRGC81848) and

population 2 (Swarna × IRGC81832) consisted of 245 and 227 BC<sub>2</sub>F<sub>2</sub> families, respectively. All the families from both the populations were genotyped and used for mapping yield and yield component traits. However, only 140 families from the population 1 and 146 families from the population 2 were used for grain quality analysis and QTL mapping.

### Field Evaluation of the Mapping Populations

The experiments were conducted at the farm of Directorate of Rice Research, Hyderabad in South India. The soil type at the experimental site was clay Vertisol. During the field evaluation from July to November in wet season 2005, the average temperature was 30 °C, and total rainfall received was 508 mm. Whereas, during 2006, wet season experiment, the average temperature was 30.5 °C, and the total rainfall was 638 mm. Population 1 was evaluated during wet season 2006 and population 2 was evaluated during wet season 2005. Two populations were grown in 2 replications in an augmented block design. Each backcross family and the control (Swarna) consisted of 30 plants planted in 3 rows of 10 plants each adopting a uniform spacing of 20 cm between rows and 15 cm between plants. Standard agronomic practices and need-based plant protection measures were adopted uniformly to raise the crop.

### Phenotyping for Quality Traits

Two-month-old seed samples after harvest with 14% moisture were used for phenotyping quality traits. One hundred grams of well-dried seeds were used for dehusking using Satake dehusker (THU35A). The dehusked and cleaned brown rice was polished to remove 8–10% bran using Satake polisher (TM05). The polished white raw rice was used for analyzing the cooking and eating quality traits.

Milling percent (mp): The ratio of weight of polished grain to weight of paddy expressed in percentage. Head rice recovery (hrr): The ratio of weight of the whole polished grains to the weight of paddy used for polishing expressed in percentage. Kernel length (kl): It is measured as average length of 10 grains in millimeters. Kernel width (kw): It is measured as average length of 10 grains in millimeters. Length/width ratio (lwr): Ratio of mean kernel length to mean kernel breadth for 10 grains. Alkali spreading value (asv): A set of 6 polished grains from each line was immersed in a freshly prepared 1.7% KOH solution and incubated at 27–30 °C for 23 h, and spreading of the rice grain was recorded by visual observation in a scale of 1–7, where score 1 is unaffected and 7 is completely dissolved based on Little et al. 1958. Amylose content (ac): It was estimated using the procedure of Juliano (1971) and expressed in percentage. Gel consistency (gc): GC was measured in millimeters according to the method of Cagampang et al. (1973). Volume expansion ratio (ver): Five grams of rice sample was taken in a test tube and soaked in 15 ml of water for 10 min and increase in volume noted. It was then cooked for 20 min. The cooked rice was dipped in 50 ml water taken in 100 ml measuring cylinder and increase in volume noted. The volume expansion ratio is estimated as ratio of increase in volume after cooking

to the volume before cooking. Elongation ratio (er): It is the ratio of mean of the kernel length after cooking to mean of kernel length before cooking. Kernel elongation after cooking (klac): Mean length of 10 cooked rice kernels in millimeters. Water uptake (wup): Water absorption was calculated as ratio of weight of water absorbed on cooking (cooked rice kernel minus dry kernel) to the milled grain weight.

### Trait Correlations

Trait correlations for 12 grain quality traits were obtained using pairwise Pearson correlations using Crop Stat v7.3.2.

### Genotyping and QTL Analysis

Leaf samples were collected on 2-month-old seedlings from the parents and the 2 mapping populations. In the mapping populations, leaves were collected from 5 plants in the middle row and bulked. DNA was extracted following the method of Zheng et al. 1995. A set of 250 randomly selected microsatellite markers from all 12 chromosomes were used to select polymorphic loci between Swarna and *O. nivara* accessions (IRGC81848 and IRGC81832). A total of 100 polymorphic microsatellite markers separated by an average distance of 15 cM were used to analyze the segregation in 227 BC<sub>2</sub>F<sub>2</sub> families of population 1 and 75 markers in 245 BC<sub>2</sub>F<sub>2</sub> families of population 2. Among the simple sequence repeat (SSR) markers used for genotyping, 45 were common between the 2 studies. The PCR reaction for SSR primers was performed with 15 µl final volume containing, 45 ng of genomic DNA, 10X buffer, 0.125 mM final concentration of each dNTPs, 0.2 µM each of forward and reverse primer, 2% formamide, and 1 U of Biogene Taq DNA Polymerase. PCR amplification was performed under the following conditions: Initial denaturation at 94 °C for 5 min, followed by 35 cycles of denaturation at 94 °C for 1 min, annealing at 55 °C for 1 min, extension at 72 °C for 2 min, followed by the final extension 72 °C for 5 min. The amplified products were checked for polymorphism or marker segregation on an agarose gel (3%) and scored for segregating bands.

### Linkage and QTL Analysis

A linkage map was constructed from the genotypic data of 100 markers in population 1 and 75 markers in population 2 using Join Map 3.0. Assignment of linkage groups to the respective chromosomes was done based on the rice maps developed at Cornell University. A chi-square test ( $P < 0.01$ ) was used to identify markers with distorted segregation. A LOD value of 2.5 and map function Kosambi were used for the estimation of map distances. QTLs were identified separately for the 2 populations using QTL Cartographer 2.5 (<http://statgen.ncsu.edu/qtlcart/WQTLCart.html>). The QTLs were detected by interval mapping (IM) and composite interval mapping (CIM) (Zeng, 1994) with a threshold LOD of 3.0. A window size of 10 cM and walk speed of 1 cM were used in the genome scan. Digenic QTL interactions were identified using QTL network 2.0.

**Table 1** Variation for 12 quality traits in 3 parents and 2 populations derived from Swarna × *Oryza nivara* (IRGC81848 and IRGC81832) crosses

| SI No. | Trait                            | Swarna mean | <i>O. nivara</i> mean | Range in BC <sub>2</sub> F <sub>2</sub> families | No. of families showing >5% increase over Swarna |
|--------|----------------------------------|-------------|-----------------------|--------------------------------------------------|--------------------------------------------------|
| 1      | Milling (%)                      | 66.8        | —                     | 41.5–76.9 (41.5–76.9)                            | 31 (32)                                          |
| 2      | Head rice recovery (%)           | 60.5        | —                     | 12.2–64 (12.2–66.3)                              | 1 (4)                                            |
| 3      | Kernel length (mm)               | 5.3         | 5.5 (4.9)             | 5.0–5.8 (4.9–5.8)                                | 37 (44)                                          |
| 4      | Kernel width (mm)                | 2.2         | 2.4 (2.2)             | 1.9–2.3 (1.9–2.3)                                | 16 (17)                                          |
| 5      | Length and width ratio           | 2.5         | 2.2 (2.2)             | 2.2–2.6 (2.2–2.6)                                | 9 (12)                                           |
| 6      | Volume expansion ratio           | 5.3         | —                     | 4–5.6 (4–5.6)                                    | 5 (14)                                           |
| 7      | Water uptake (ml)                | 120.0       | —                     | 105–265 (105–265)                                | 117 (139)                                        |
| 8      | Kernel length after cooking (mm) | 8.1         | 10.3 (9.8)            | 7.6–11.1 (7.6–11.1)                              | 92 (115)                                         |
| 9      | Elongation ratio                 | 1.5         | 1.9 (2.3)             | 1.42–2.11 (1.4–2.11)                             | 94 (116)                                         |
| 10     | Alkali spreading value           | 7.0         | 5.0 (5.0)             | 3.0–5.0 (3.0–5.0)                                | —                                                |
| 11     | Amylose content (%)              | 26.1        | 23.8 (23.5)           | 18.5–29.0 (17.7–29.0)                            | 13 (12)                                          |
| 12     | Gel consistency (mm)             | 65.0        | 56 (58)               | 23–80 (23–80)                                    | 3 (5)                                            |

Values for population 2 (BC<sub>2</sub>F<sub>2</sub> from Swarna × IRGC81832) are shown in parentheses corresponding to values for population 1 (BC<sub>2</sub>F<sub>2</sub> from Swarna × IRGC818).

## Results

### Trait Analysis

The appearance of transgressive segregants in the progenies of wide crosses is a common phenomenon. This may be due to the accumulation of superior alleles from the 2 distinct parents in the segregating progenies and also because of the different types of interactions among them. In the present investigation, transgressive segregants were observed for all the grain quality traits except *asv* in both the populations (Table 1). As many as, 75% of all the families showed at least 5% increase over Swarna for the traits *wup*, *er*, and *klac*. One family each namely 83, 229, and 69 showed an increase of up to 120%, 37%, and 40% for *wup*, *er*, and *klac*, respectively. Twenty-nine families showed an increase of 11% in *ac* and 12 families showed an increase of 23% in *gc*. The increase in trait value was up to 10% in the remaining traits. The frequency of almost all the traits showed near normal distribution, and the distribution patterns in populations 1 and 2 were similar. Specifically, all the traits except *ac* and *ver* showed a near normal distribution (Supplementary Figure 1).

There were 14 significant correlations among the 12 traits in population 1 and 13 significant correlations in population 2. The trait correlations were almost similar in both the populations. In both the populations, highly significant correlations were observed between *kl* on one hand and *kw*, *lbr*, *er*, *ac*, and *gc* on the other. The trait *klac* showed the highest positive correlation with *er* in both populations (0.936, 0.933,  $P < 0.01$ ), the next was *lbr* with *kl* (0.603, 0.612,  $P < 0.01$ ). A highly negative correlation was found between *kw* and *lbr* in both populations (−0.659, −0.643,  $P < 0.01$ ). Other significant positive correlations were between *kw* and *ver* and between *wup* and *asv* in both the populations (Supplementary Table 1). Even though 2 different *O. nivara* accessions from 2 different environments were used in the development of the mapping population,

the range of variability for all traits and the correlations were almost similar in the 2 populations. This could be because the 2 *O. nivara* accessions used in the development of the mapping populations originated from 2 adjoining states of India—Uttar Pradesh and Bihar. Second, the 2 accessions were similar in quality traits and may have produced similar kind of transgressive segregants. Third, even if there was a difference in the 2 populations, it was not obvious as Swarna type of plants were selected in BC<sub>1</sub> and BC<sub>2</sub>. Wild species accessions from different ecogeographical locations are likely to generate different variability.

### QTL Analysis

QTLs were identified by IM or CIM or both. Most of the QTLs were derived from Swarna. However, many new and trait-improving QTLs were mapped from *O. nivara*. In all, 21 QTLs were detected for 9 traits in population 1 and 37 QTLs for 8 traits in population 2 (Table 2). QTLs showing PV of less than 5% are not shown. All the QTLs are depicted in Figure 1.

#### Milling Percent

Milling quality is an important trait for rice industry. Milling percent depends on the grain size, shape, and chalkiness. The maximum number QTLs were obtained for milling percent, 7 QTLs in population 1 and 12 QTLs in population 2. The QTL *mp1.2* in both the populations mapped to the same region RM24–RM595 and showed the highest additive effect for *mp* in both populations.

#### Kernel Length and Width

Kernel length, width, and shape are important for minimizing percentage of broken rice after milling and consumer preference. For kernel length, only 1 QTL was identified on chromosome 1 only in population 1. For

**Table 2** QTLs identified for 12 grain quality traits by IM and CIM in population 1 (Swarna × *Oryza nivara* [IRGC81848]) and population 2 (Swarna × *Oryza nivara* [IRGC81832])

| Trait                            | Chromosome | Marker interval | Allelic effect | IM  |                |                 | CIM  |                |                                  | Trait                  | Chromosome | Marker interval | Allelic effect | IM   |                |                 | CIM  |                |                 |
|----------------------------------|------------|-----------------|----------------|-----|----------------|-----------------|------|----------------|----------------------------------|------------------------|------------|-----------------|----------------|------|----------------|-----------------|------|----------------|-----------------|
|                                  |            |                 |                | LOD | R <sup>2</sup> | Additive effect | LOD  | R <sup>2</sup> | Additive effect                  |                        |            |                 |                | LOD  | R <sup>2</sup> | Additive effect | LOD  | R <sup>2</sup> | Additive effect |
| Population 1                     |            |                 |                |     |                |                 |      |                | Population 2                     |                        |            |                 |                |      |                |                 |      |                |                 |
| Milling percent (%)              |            |                 |                |     |                |                 |      |                | Milling percent (%)              |                        |            |                 |                |      |                |                 |      |                |                 |
| mp1.1                            | 1          | RM490–RM243     | Swarna         | 6.1 | 6              | 5.34            | 4.54 | 8              | 4.02                             | mp1.1                  | 1          | RM499–RM428     | Swarna         | 10.7 | 25             | 14.80           | 5.9  | 35             | 13.48           |
| mp1.2                            | 1          | RM24–RM594      | <i>nivara</i>  |     |                |                 | 4.57 | 5              | −0.69                            | mp1.2                  | 1          | RM81–RM595      | <i>nivara</i>  | 8.4  | 4              | −0.83           |      |                |                 |
| mp6.1                            | 6          | RM314–RM3       | Swarna         | 5.4 | 21             | 0.79            |      |                |                                  | mp1.3                  | 1          | RM488–RM126     | Swarna         | 11.8 | 24             | 0.41            |      |                |                 |
| mp7.1                            | 7          | RM172–RM248     | Swarna         |     |                |                 | 7.02 | 6              | 2.05                             | mp2.1                  | 2          | RM423–RM438     | Swarna         | 9.6  | 5              | 0.23            |      |                |                 |
| mp9.1                            | 9          | RM288–RM107     | Swarna         |     |                |                 | 2.77 | 5              | 3.78                             | mp3.1                  | 3          | RM7–RM16        | Swarna         | 12.1 | 8              | −0.58           |      |                |                 |
| mp11.1                           | 11         | RM209–RM21      | Swarna         | 8   | 7              | 2.82            |      |                |                                  | mp4.1                  | 4          | RM261–RM241     | Swarna         | 12.5 | 22             | 3.48            |      |                |                 |
| mp12.1                           | 12         | RM415–RM19      | Swarna         | 9.3 | 10             | 0.41            |      |                |                                  | mp4.2                  | 4          | RM241–RM567     | Swarna         | 8.0  | 5              | 10.45           |      |                |                 |
|                                  |            |                 |                |     |                |                 |      |                |                                  | mp5.1                  | 5          | RM430–RM574     | Swarna         | 9.5  | 17             | 0.98            | 5.68 | 6              | 2.47            |
|                                  |            |                 |                |     |                |                 |      |                |                                  | mp5.2                  | 5          | RM574–RM249     | Swarna         | 3.5  | 5              | 0.85            |      |                |                 |
|                                  |            |                 |                |     |                |                 |      |                |                                  | mp5.3                  | 5          | RM249–RM26      | Swarna         | 7.4  | 12             | 2.30            |      |                |                 |
|                                  |            |                 |                |     |                |                 |      |                |                                  | mp8.1                  | 8          | RM337–RM38      | Swarna         | 5.6  | 6              | 2.34            |      |                |                 |
|                                  |            |                 |                |     |                |                 |      |                |                                  | mp12.1                 | 12         | RM247–RM519     | Swarna         | 8.7  | 10             | 13.15           |      |                |                 |
| Kernel length (mm)               |            |                 |                |     |                |                 |      |                | Kernel width (mm)                |                        |            |                 |                |      |                |                 |      |                |                 |
| kl1.1                            | 1          | RM499–RM84      | Swarna         | 3.3 | 6              | 0.1             |      |                |                                  | kw1.1                  | 1          | RM499–RM428     | <i>nivara</i>  | 3.3  | 30             | −0.36           |      |                |                 |
| Kernel width (mm)                |            |                 |                |     |                |                 |      |                | Kernel width (mm)                |                        |            |                 |                |      |                |                 |      |                |                 |
| kw3.1                            | 3          | RM135–RM168     | <i>nivara</i>  | 2.8 | 17             | −0.06           | 2.86 | 16             | −0.06                            | kw1.2                  | 1          | RM81–RM9        | <i>nivara</i>  | 5.2  | 13             | −0.27           | 4.07 | 13             | −0.12           |
| kw6.1                            | 6          | RM190–RM314     | <i>nivara</i>  |     |                |                 | 2.85 | 9              | −0.04                            | kw1.3                  | 1          | RM488–RM126     | <i>nivara</i>  | 4.0  | 30             | −0.17           | 3.32 | 11             | −0.03           |
|                                  |            |                 |                |     |                |                 |      |                |                                  | kw1.4                  | 1          | RM226–RM431     | <i>nivara</i>  | 4.4  | 12             | −0.14           |      |                |                 |
|                                  |            |                 |                |     |                |                 |      |                |                                  | kw4.1                  | 4          | RM185–RM241     | <i>nivara</i>  | 2.9  | 12             | −0.25           |      |                |                 |
|                                  |            |                 |                |     |                |                 |      |                |                                  | kw5.1                  | 5          | RM249–RM26      | <i>nivara</i>  | 4.2  | 9              | −0.09           |      |                |                 |
|                                  |            |                 |                |     |                |                 |      |                |                                  | kw6.1                  | 6          | RM204–RM3       | <i>nivara</i>  | 3.2  | 12             | −0.10           |      |                |                 |
|                                  |            |                 |                |     |                |                 |      |                |                                  | kw8.1                  | 8          | RM152–RM38      | <i>nivara</i>  | 4.2  | 13             | −0.10           |      |                |                 |
| L\B ratio                        |            |                 |                |     |                |                 |      |                | L\B ratio                        |                        |            |                 |                |      |                |                 |      |                |                 |
| lwr12.1                          | 12         | RM415–RM19      | <i>nivara</i>  |     |                |                 | 2.56 | 9              | −0.05                            | lwr2.1                 | 2          | RM174–M324      | <i>nivara</i>  | 3.0  | 10             | −0.03           | 2.7  | 7              | −0.03           |
| Water uptake                     |            |                 |                |     |                |                 |      |                | Water uptake                     |                        |            |                 |                |      |                |                 |      |                |                 |
| wup2.1                           | 2          | RM250–RM535     | <i>nivara</i>  | 3.3 | 24             | −28.15          |      |                |                                  | lwr6.1                 | 6          | RM584–RM217     | <i>nivara</i>  | 3.1  | 8              | −0.03           | 4.23 | 6              | −0.02           |
| wup3.1                           | 3          | RM282–RM55      | Swarna         | 2.6 | 15             | 38.79           |      |                |                                  | Volume expansion ratio |            |                 |                |      |                |                 |      |                |                 |
|                                  |            |                 |                |     |                |                 |      |                |                                  | ver1.1                 | 1          | RM488–RM128     | Swarna         | 3.9  | 8              | 0.02            |      |                |                 |
| Kernel length after cooking (mm) |            |                 |                |     |                |                 |      |                | Kernel length after cooking (mm) |                        |            |                 |                |      |                |                 |      |                |                 |
| klac5.1                          | 5          | RM26–RM31       | <i>nivara</i>  | 2.5 | 12             | −1.06           |      |                |                                  | ver1.2                 | 1          | RM226–RM431     | Swarna         | 2.8  | 9              | 0.04            |      |                |                 |
| klac12.1                         | 12         | RM19–RM453      | <i>nivara</i>  | 3.4 | 15             | −21.32          |      |                |                                  | ver5.1                 | 5          | RM430–RM26      | Swarna         | 4.2  | 5              | 0.05            |      |                |                 |
| Elongation ratio                 |            |                 |                |     |                |                 |      |                | Elongation ratio                 |                        |            |                 |                |      |                |                 |      |                |                 |
| er3.1                            | 3          | RM55–RM520      | <i>nivara</i>  | 2.7 | 21             | −0.68           |      |                |                                  | Alkali spreading value |            |                 |                |      |                |                 |      |                |                 |
|                                  |            |                 |                |     |                |                 |      |                |                                  | asv11.1                | 11         | RM209–RM21      | <i>nivara</i>  | 2.6  | 30             | −0.3            |      |                |                 |

**Table 2** Continued

| Trait                | Chromosome | Marker interval | Allelic effect | IM  |                | Additive effect | CIM  |                | Trait                | Chromosome | Marker interval | Allelic effect | IM     |                | CIM |                |      |                |      |                |     |                |               |                |     |                |      |                |      |                |      |                |      |
|----------------------|------------|-----------------|----------------|-----|----------------|-----------------|------|----------------|----------------------|------------|-----------------|----------------|--------|----------------|-----|----------------|------|----------------|------|----------------|-----|----------------|---------------|----------------|-----|----------------|------|----------------|------|----------------|------|----------------|------|
|                      |            |                 |                | LOD | R <sup>2</sup> |                 | LOD  | R <sup>2</sup> |                      |            |                 |                | LOD    | R <sup>2</sup> | LOD | R <sup>2</sup> | LOD  | R <sup>2</sup> | LOD  | R <sup>2</sup> | LOD | R <sup>2</sup> | LOD           | R <sup>2</sup> | LOD | R <sup>2</sup> | LOD  | R <sup>2</sup> | LOD  | R <sup>2</sup> | LOD  | R <sup>2</sup> | LOD  |
| Amylose content (%)  |            |                 |                |     |                |                 |      |                | Amylose content (%)  |            |                 |                |        |                |     |                |      |                |      |                |     |                |               |                |     |                |      |                |      |                |      |                |      |
| ac2.1                | 2          | RM262–RM3515    | <i>nivara</i>  | 3.4 | 11             | −2.19           |      |                | ac1.1                | 1          | RM243–RM582     | Swarna         |        |                |     |                | 2.63 | 5              | 0.27 | ac5.1          | 5   | RM413–RM13     | <i>nivara</i> | 2.6            | 9   | −0.34          |      |                |      |                | 3.54 | 9              | 0.26 |
| ac3.1                | 3          | RM22–RM7        | Swarna         |     |                |                 | 2.51 | 5              | 0.87                 | ac5.2      | 5               | RM153–RM413    | Swarna |                |     |                |      |                |      |                |     |                |               |                |     |                |      |                |      |                |      |                |      |
| ac3.2                | 3          | RM85–RM293      | Swarna         | 2.6 | 15             | 2.05            |      |                |                      |            |                 |                |        |                |     |                |      |                |      |                |     |                |               |                |     |                |      |                |      |                |      |                |      |
| ac6.1                | 6          | RM314–RM3       | Swarna         | 2.6 | 23             | 0.86            |      |                |                      |            |                 |                |        |                |     |                |      |                |      |                |     |                |               |                |     |                |      |                |      |                |      |                |      |
| Gel consistency (mm) |            |                 |                |     |                |                 |      |                | Gel consistency (mm) |            |                 |                |        |                |     |                |      |                |      |                |     |                |               |                |     |                |      |                |      |                |      |                |      |
| gc2.1                | 2          | RM250–RM535     | Swarna         |     |                |                 | 3.18 | 14             | 10.1                 | gc1.1      | 1               | RM499–RM428    | Swarna | 3.9            | 30  | 5.67           | 4.21 | 29             | 5.49 | gc1.2          | 1   | RM580–RM81     | Swarna        | 3.2            | 21  | 6.45           |      |                |      |                |      |                |      |
|                      |            |                 |                |     |                |                 |      |                |                      | gc2.1      | 2               | RM475–RM250    | Swarna | 3.7            | 4   | 0.61           |      |                |      | gc4.1          | 4   | RM185–RM241    | Swarna        | 4.2            | 12  | 0.89           | 3.08 | 13             | 4.67 |                |      |                |      |
|                      |            |                 |                |     |                |                 |      |                |                      | gc11.1     | 11              | RM209–RM21     | Swarna | 2.9            | 30  | 4.25           | 3.36 | 8              | 0.53 |                |     |                |               |                |     |                |      |                |      |                |      |                |      |

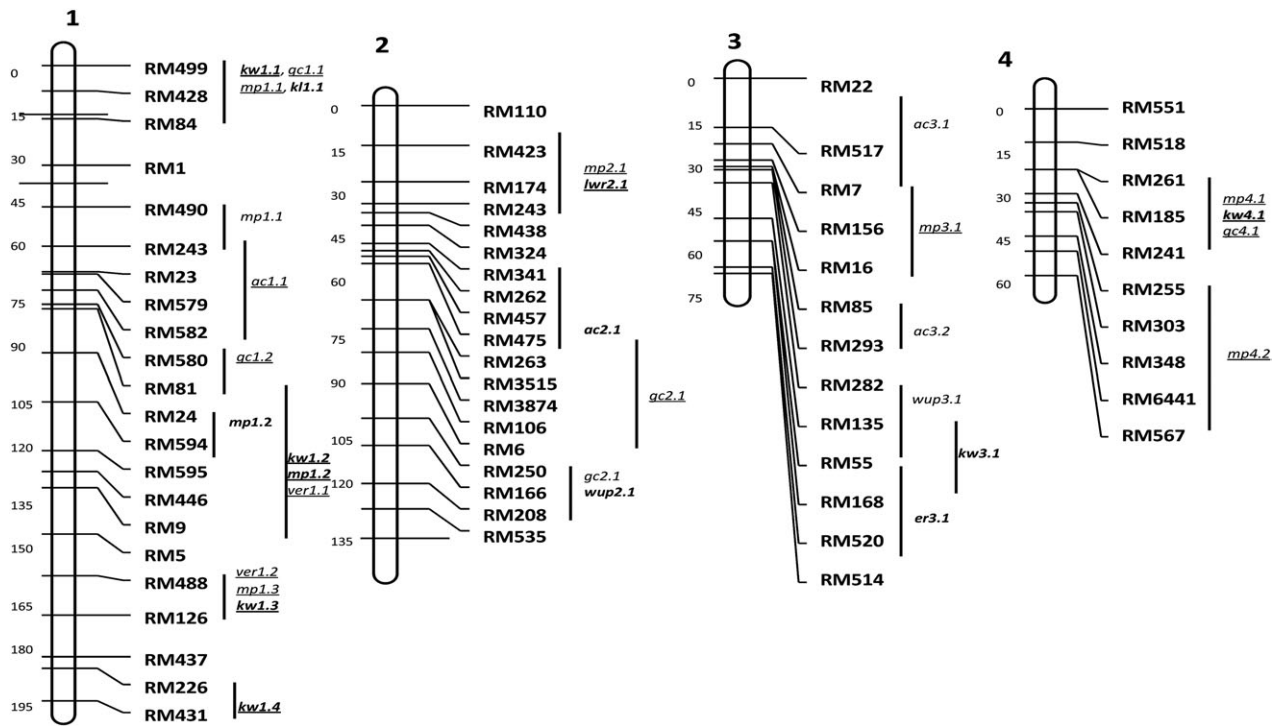

**Figure 1.** Location of QTLs for 11 grain quality traits identified in *Oryza nivara* × Swarna-derived backcross populations. Note: QTLs underlined are from population 2 and QTLs in bold are derived from *O. nivara*.

kernel width, 2 QTLs were detected on chromosomes 3 and 6 in population 1; both were derived from *O. nivara*. In population 2, 8 QTLs were detected and all had trait-enhancing allele from *O. nivara*.

*Length and Width Ratio*

More than the length and width, it is the ratio between them that appears to be more important specially for milling percent as long and slender grains break more often than short and bold grains during milling. One QTL was identified on chromosome 12; it was derived from *O. nivara*. Two QTLs were identified in population 2 on chromosomes 2 and 6, and both were from *O. nivara*.

*Volume Expansion Ratio and Water Uptake*

Cooking quality of rice is evaluated in terms of characteristics, such as grain elongation, volume expansion, and water absorption during cooking. The genetic analysis of these cooking quality traits is very limited. Generally, less water uptake is preferred. Three QTLs were identified only in population 2, and all were derived from Swarna. For water uptake, 2 QTLs were identified only in population 1 and on chromosomes 2 and 3; one of these QTLs was from *O. nivara*.

*Kernel Length after Cooking*

Two QTLs were identified for klac and both were derived from *O. nivara*, and these were located on chromosomes 5

and 12 in population 1. Three QTLs were identified in population 2, but only 1 of these was derived from *O. nivara* and was on chromosome 12 (Table 2).

*Elongation Ratio*

Only 1 QTL was identified for er on chromosome 3 in population 1. It explained 21% phenotypic variance and *O. nivara* allele at this locus increased the elongation ratio.

*Alkali Spreading Value*

Alkali spreading value determines the gelatinization temperature (GT), which is a critical temperature range at which the starch granules undergo an irreversible process known as gelatinization on cooking. Only 1 QTL was detected in population 2 and the trait-improving allele from *O. nivara* explained 30% phenotypic variance.

*Amylose Content*

Amylose content of rice grain determines the cooking and eating quality of rice to a large extent. Rice with low amylose content becomes sticky after cooking and vice versa. In India, nonsticky rice is generally preferred. Four QTLs were identified on 3 chromosomes; 1 QTL was derived from *O. nivara* in population 1. Three QTLs were detected in population 2, but only 1 QTL was derived from *O. nivara*. At the locus ac5.1, the *O. nivara* allele enhanced ac and at ac5.2, the Swarna allele enhanced ac.

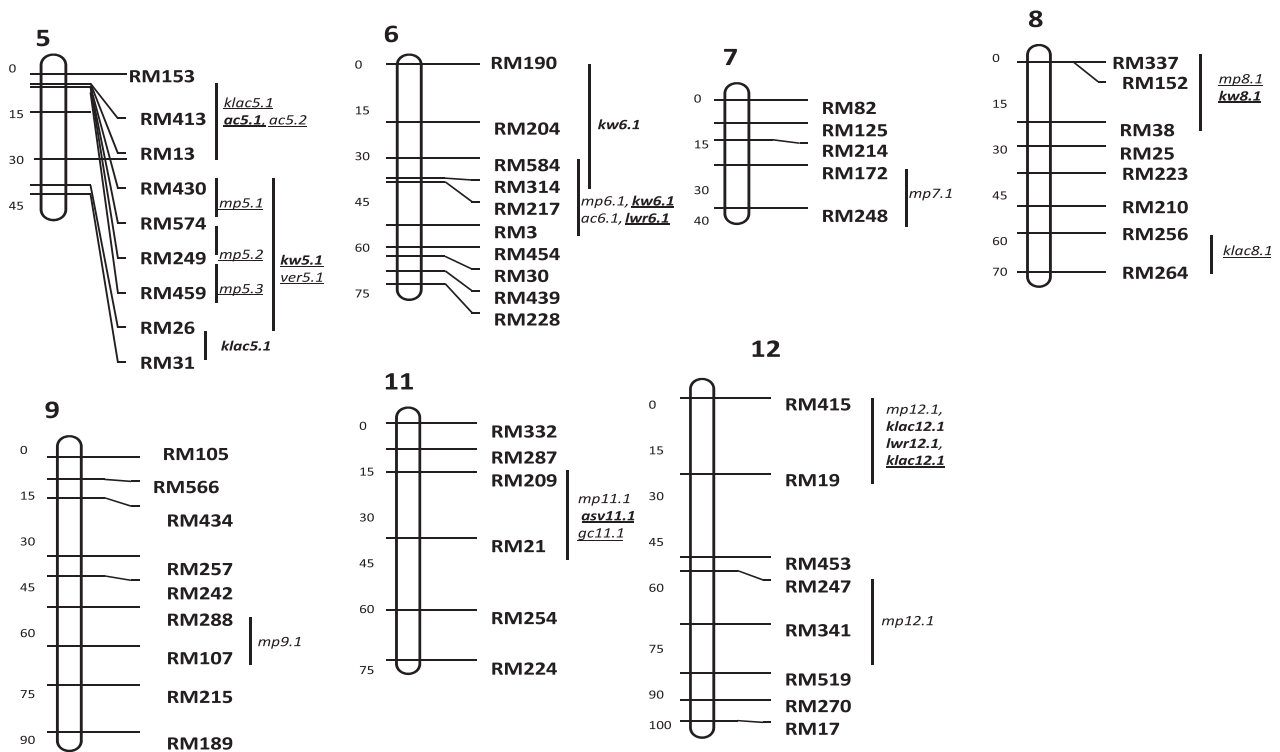

**Figure 1.** Continued

#### Gel Consistency

Gel consistency is a good index of assessing the texture of cooked rice and also important for a good mouth feel. Soft gel consistency is generally preferred by most rice consumers. One QTL was detected on chromosome 2 in population 1 and 5 QTLs were detected in population 2. All the gc increasing alleles were derived from Swarna.

#### QTL Interaction

There was only 1 significant digenic interaction detected between 2 QTLs. The interacting loci were RM22–RM517 for ac3.1 on chromosome 3 and RM249–RM459 for mp5.3, kw5.1, and ver5.1 on chromosome 5, but the interaction was detected only in population 1.

#### Discussion

The advantages of using a wild accession are the appearance of transgressive segregants in the elite genetic backgrounds either due to wild allele introgressions or due to de novo arisen genetic variation. In the present investigation, transgressive segregants were observed for all the grain quality traits in both the *O. nivara* populations. Transgressive segregants have also been reported previously for quality traits in populations derived from *O. glaberrima* and *O. rufipogon* as donor parents (Septiningsih et al. 2003; Aluko et al. 2004; Li et al. 2004; Yuan et al. 2010).

The frequency distribution of all the traits followed a normal distribution except only 2 traits, ver and ac, in our study. A bimodal distribution was reported for ac (He et al. 1999) and normal distribution for ver (Tian et al. 2005). The trait correlations were almost similar in both the populations. The mp was highly positively correlated with hrr, kl, and kw. Significant correlations were observed between kl on one hand and kw, lbr, er, ac, and gc on the other hand in both the populations. A highly negative correlation was found between kw and lbr. In a previous study, mp was highly positively correlated with hrr, grain density, and broken rice in *O. rufipogon*-derived population (Septiningsih et al. 2003). A highly significant positive correlation between klac and er ratio was obtained in our study and also in a RIL population of Zhenshan 97 and Minghui 63 (Ge et al. 2005). Likewise, the highest negative correlation was reported between kw and lbr in our study and also in a RIL population of Pusa1121 and Pusa1342 (Amarawathi et al. 2008).

The highest number of QTLs was identified for mp in both the populations. As expected for a quality trait, the Swarna-derived QTL alleles explained more phenotypic variance in both populations. QTLs mp6.1 and mp12.1 explained 21% phenotypic variance in population 1. Whereas, mp1.1, mp1.3, and mp4.1, each explained more than 20% variance in population 2. Most of the QTLs reported in our study are new and some of them explain high PV compared with that reported earlier. For kl only 1 QTL was detected on chromosome 1 in population 1, and it was derived from Swarna. For kernel width, trait-enhancing



QTLs were identified from *O. nivara* in both the populations. The QTL kw3.1 explained 17% PV in population 1, kw1.1 and kw1.3 each explained 30% PV in population 2. Amarawathi et al. (2008) mapped QTLs explaining 10.1% and 18.9% PV for grain width on chromosomes 1 and 7. The QTLs on chromosome 1 mapped in our study are also on the long arm but at different location than that reported by Amarawathi et al. (2008). Two major loci lwr12.1 and lwr2.1 were detected for grain length and width. The QTL lwr12.1 located at marker interval RM415–RM19 explained 9% PV in population 1 and lwr2.1 located at marker interval RM174–RM324 explained 10% PV in population 2. The QTL lwr12.1 in our study is close to the lwr12.1 from *O. glaberrima* reported by Li et al. (2004). It is significant to mention here that many QTLs identified for mp in our study were at the same locations as kl, kw, and lbr. This confirms the observation that mp is largely determined by grain dimensions. A major effect QTL wup2.1 was detected on long arm of chromosome 2 for the trait wup. It explained 24% PV and increased the wup by 28 ml. In comparison, the wup QTL from *O. sativa* Zhenshan 97 was on short arm of chromosome 2 and explained 6% PV and increased wup by only 0.4 ml (Ge et al. 2005).

Trait-enhancing QTLs from *O. nivara* were detected for klac at marker intervals RM26–RM31 and RM19–RM453 explaining 12% and 15% PV in population 1 (Figure 1). Three QTLs were detected in population 2 between marker intervals RM153–RM13, RM256–RM264, and RM415–RM19 explaining 15%, 7%, and 12% PV, respectively. In *O. glaberrima*-derived population, a klac QTL ke3.1 was identified on chromosome 3; it had a phenotypic variance of 6% and an additive effect of 0.24 (Li et al. 2004). In a Zhenshan 97- and Delong 208-derived population, QTLs were identified for klac on chromosomes 3, 6, 7, and 8. He et al. (1999) identified QTLs on chromosomes 3 and 6, each one of these explained 28% PV. In Zhenshan 97 and Minghui 63 population, QTLs were detected for width expansion on chromosomes 1, 2, 3, 6, 9, and 11. The QTLs on chromosomes 3 and 6 showed highest PV of 15% and 12%, respectively (Ge et al. 2005).

A significant QTL er3.1 derived from *O. nivara* was identified for er on chromosome 3. It explained 21% PV and had an additive effect of 0.68. It could be a candidate for use in MAS to increase er. Earlier, a QTL was reported for er on chromosome 11, it showed a phenotypic variance of 6% and an additive effect of 0.45 (Amarawathi et al. 2008).

For asv, 1 major effect QTL with 30% phenotypic variance was mapped at marker interval RM202–RM209 on chromosome 11. This is a new QTL. Earlier, QTLs for asv were reported on chromosome 6 explaining 87% PV in a population derived from Balilla/Nantehao cross (Yan et al. 2001) and 44% PV in Caiapo cultivar background (Aluko et al. 2004) and to a smaller region within that QTL explaining 7% PV in a RIL population (Amarawathi et al. 2008).

Amylose content of rice grain determines the cooking and eating quality of rice to a large extent (Lin et al. 2011). Amylose content is known to be regulated by waxy gene

for granule bound starch synthase on chromosome 6. In our study, the QTL on chromosome 6 was derived from *O. nivara* and explained 23% of phenotypic variance in population 1. Karim et al. (2011) mapped apparent amylose content to waxy region. Ge et al. (2005) also reported a region near waxy locus controlling grain length, width, weight, elongation, width expansion, and water absorption. In the present study, QTLs for ac, mp, and kw were collocated in the waxy region in population 1. In most of the previous QTL mapping studies on cultivated rice, ac was mapped at the waxy locus. However, QTLs for ac were not detected in wx region in our study in population 2 and also in 2 previous studies using *O. rufipogon* (Yuan et al. 2010) and Iranian traditional cultivar (Sabouri 2009).

In the present investigation, QTL alleles from Swarna enhanced gc. One QTL gc2.1 explained 14% phenotypic variance in the population 1, 3 QTLs, gc1.1, gc1.2, and gc11.1, each explained more than 20% PV in population 2. He et al. (1999) identified 2 QTLs for gc on chromosomes 2 (near centromere) and 7. Li et al. (2003) identified QTLs for gc on chromosomes 1, 2, and 6 from *O. sativa* cross. Li et al. (2004) identified QTLs for gc from *O. glaberrima* on chromosomes 2 and 7. Thus, it appears that gc-enhancing alleles are selected for in evolution in the cultivated rice species *O. sativa* and *O. glaberrima* and that *O. nivara* has alleles for lower gc than Swarna.

It is significant to note that collocated QTLs were highly correlated. For example, QTLs for kl and kw; klac, wup, lbr, and asv spreading value were collocated and also these traits were significantly correlated.

A comparison was made between QTLs identified for quality traits in our study with previous report of *O. nivara* (accession IRGC80470)-derived QTLs for shattering and dormancy, 2 domestication related traits. Many QTLs were coincident. QTL er3.1 was located near QTL sh3 between the marker RM303 and RM293. Likewise, mp4.1 and mp4.2 were found in the region sh4 between RM303 and RM280. The QTL for kernel length, kl1.1 was found within the dormancy QTL flanked by RM495 and RM283 on chromosome 1 and klac12.1 was found within the dormancy QTL sd12 flanked by RM19 and RM453 (Li et al. 2006). This indicates that these new QTLs mapped in our study may have been left behind during domestication as they were linked to the undesirable QTLs for shattering and dormancy. More such novel QTLs may be revealed, if different wild accessions from different ecogeographical regions are used in backcrossing programs to increase yield and quality.

A comparison was also made between the location of QTLs for yield and those for quality traits obtained from the same 2 populations. Two major effect yield QTLs from population 1 and 5 major effect QTLs from population 2 were considered for this comparison (Kaladhar et al. 2008; Swamy et al. 2011). It was interesting to observe that QTLs for 4 quality traits were associated with 5 of the 7 major yield QTLs analyzed. The QTL for water uptake, wup2.1 collocated with yld2.3 in population 1. The mp3.1 was located with yld3.1, mp3.3 was near yld3.2, kw8.1 and ver8.1

near yld8.1, and ver8.1 near yld8.2 in population 2. The 18 QTLs reported in this study, which map to previously reported QTLs for the same trait or for meta-QTLs for yield are presented in Supplementary Table 2 (Swamy and Sarla 2008, 2011). This information is useful in breeding for high yielding varieties with different combination of quality traits.

This study clearly demonstrates that *O. nivara* has useful alleles for improving quality traits, for example, mp and klac, even in an elite genetic background such as Swarna. QTLs mapped for quality traits coincided in the 2 populations and were collocated with QTLs identified for yield and related traits in the same 2 populations. The 7 major effect yield-enhancing QTLs from *O. nivara* in the 2 populations can possibly be introgressed individually or pooled selectively without compromising grain quality in Swarna. Introgression lines with improved seed quality include the fine grain lines RPBio 4918-14, RPBio 4918-148, and RPBio 4918-166 and their derivatives 14-3, 166-2, 166-9, 175-1, 175-2, RPBio4918-175, and 166-30.

## Supplementary Material

Supplementary material can be found at <http://www.jhered.oxfordjournals.org/>.

## Funding

The project was supported by funds from Department of Biotechnology, Ministry of Science and Technology, Government of India to N.S. as part of the Network Project on Functional Genomics of Rice (BT/AB/03/FG/DRR-II/01/2004-05).

## Acknowledgments

We thank UGC CSIR for fellowship to B.P.M.S. and Venkaiah for help in grain quality analysis.

## References

Aluko G, Martinez C, Tohme J, Castano C, Bergman C, Oard JH. 2004. QTL mapping of grain quality traits from the interspecific cross *Oryza sativa* × *O. glaberrima*. *Theor Appl Genet.* 109:630–639.

Amarawathi Y, Singh R, Singh AK, Singh VP, Mohapatra T, Sharma TR, Singh NK. 2008. Mapping of quantitative trait loci for basmati quality traits in rice (*Oryza sativa* L.). *Mol Breed.* 21:49–65.

Bai X, Lijun L, Wenhao Y, Mallikarjuna RK, Wei Z, Yongzhong X. 2010. Genetic dissection of rice grain shape using a recombinant inbred line population derived from two contrasting parents and fine mapping a pleiotropic quantitative trait locus GL7. *BMC Genet.* 11:1–11.

Bao JS, He P, Li SG, Xia YW, Chen Y, Zhu LH. 2000. Comparative mapping of quantitative trait loci controlling the cooking and eating quality of rice. *Sci Agric Sin.* 33:8–13.

Cagampang GB, Perez CM, Juliano BO. 1973. A gel consistency test for eating quality of rice. *J Sci Food Agric.* 24:1589–1594.

Fitzgerald MA, McCouch SR, Hall RD. 2009. Not just a grain of rice: the quest for quality. *Trends Plant Sci.* 14:133–139.

Ge XJ, Xing YZ, Xu CG, He YQ. 2005. QTL analysis of cooked rice grain elongation, volume expansion and water absorption using a recombinant inbred population. *Plant Breed.* 124:121–126.

Hao X, Maxiu F, Hu PS, Zhang Z, Sui GM, Hua ZT. 2010. Relationship between plant type and grain quality of japonica hybrid rice in Northern China. *Rice Sci.* 17:43–50.

He P, Li SG, Qian Q, Ma YQ, Li JZ, Wang WM, Chen Y, Zhu LH. 1999. Genetic analysis of rice grain quality. *Theor Appl Genet.* 98:502–508.

Jin L, Yan L, Yafang S, Gan Z, Peng X, Shengquan S, Harold C, Jinsong B. 2010. Molecular marker assisted selection for improvement of the eating, cooking and sensory quality of rice (*Oryza sativa* L.). *J Cereal Sci.* 51:159–164.

Joshi SP, Gupta VS, Aggarwal RK, Ranjekar PK, Brar DS. 2000. Genetic diversity and phylogenetic relationship as revealed by inter simple sequence repeat (ISSR) polymorphism in the genus *Oryza*. *Theor Appl Genet.* 100:1311–1320.

Jue L, Liang C, Gaohong Y, Qiaojun L, Hanwei M, Liang X, Lijun L. 2009. QTL mapping of grain quality traits in rice. *J Cereal Sci.* 50:145–151.

Juliano BO. 1971. A simplified assay for milled-rice amylose. *Cereal Sci Today.* 16:334–336.

Juneja S, Das A, Joshi SV, Sharma S, Yogesh Vikal Y, Patra BC, Bharaj TS, Sidhu JS, Singh K. 2006. *Oryza nivara* (Sharma et Shastry) the progenitor of *O. sativa* (L.) subspecies indica harbours rich genetic diversity as measured by SSR markers. *Curr Sci.* 91:1079–1085.

Kaladhar K, Swamy BPM, Babu AP, Reddy CS, Sarla N. 2008. Mapping quantitative trait loci for yield traits in BC<sub>2</sub>F<sub>2</sub> population derived from Swarna × *O. nivara* cross. *Rice Genet Newsl.* 24:10.

Karim T, McClung AM, Chen MH. 2011. Inheritance of flour paste viscosity is associated with a rice *Waxy* gene exon 10 SNP marker. *J Cereal Sci.* 53:37–44.

Lanceras JC, Haung ZL, Naivikul O, Vanavichit A, Raunjaichon V, Tragoonrun S. 2000. Mapping of genes for cooking and eating qualities in Thai Jasmine rice (KDML105). *DNA Res.* 7:93–101.

Li C, Zhou A, Sang T. 2006. Genetic analysis of rice domestication syndrome with the wild annual species, *O. nivara*. *New Phytol.* 170:185–193.

Li JM, Xiao JH, Grandillo S, Jiang LY, Wan YZ, Deng QY, Yuan LP, Mc Couch SR. 2004. QTL detection for rice grain quality traits using an interspecific backcross population derived from cultivated Asian (*O. sativa*) and African (*O. glaberrima*) rice. *Genome.* 47:697–704.

Li Z, Wan J, Xia J, Yano M. 2003. Mapping quantitative trait loci controlling physico-chemical properties of rice grains (*Oryza sativa*). *Breed Sci.* 53:209–215.

Lin JH, Singh H, Chang YT, Chang YH. 2011. Factor analysis of the functional properties of rice flours from mutant genotypes. *Food Chem.* 126:1108–1114.

Little RR, Hilder GB, Dawson EH. 1958. Differential effect of dilute alkali on 25 varieties of milled white rice. *Cereal Chem.* 35:111–126.

Myint Y, Khin TN, Apichart V, Witith C, Theerayut T. 2009. Marker assisted backcross breeding to improve cooking quality traits in Myanmar rice cultivar Manawthukha. *Field Crops Res.* 113:178–186.

Nelson JC, McClung AM, Fjellstrom RG, Moldenhauer KAK, Boza E, Jodari F, Oard JH, Linscombe S, Scheffler BE, Yeater KM. 2011. Mapping QTL main and interaction influences on milling quality in elite US rice germplasm. *Theor Appl Genet.* 122:291–309.

Redona E, Mackill DJ. 1998. Quantitative trait locus analysis for rice panicle and grain characteristics. *Theor Appl Genet.* 101:823–829.

Rodante ET, Stanley OPBS, Emmanuel RT. 2009. Relationship of milled percentages and flowering-related traits in rice. *J Cereal Sci.* 49:122–127.

Sabouri H. 2009. QTL detection of rice grain quality traits by microsatellite markers using an *indica* rice (*Oryza sativa* L.) combination. *Indian Acad Sci.* 88:81–85.

- Samuel A, Ordonez J, James S, James HO. 2010. Association mapping of grain quality and flowering time in elite japonica rice germplasm. *J Cereal Sci.* 51:337–343.
- Sarla N, Bobba S, Siddiq EA. 2003. ISSR and SSR markers based on AG and GA repeats delineate geographically diverse *Oryza nivara* accessions and reveal rare alleles. *Curr Sci.* 84:683–690.
- Septiningsih EM, Trijatmiko KR, Moeljopawiro S, McCouch SR. 2003. Identification of quantitative trait loci for grain quality in an advanced backcross population derived from the *Oryza sativa* variety IR64 and the wild relative *O. rufipogon*. *Theor Appl Genet.* 107:1433–1441.
- Shao G, Tang S, Luo J, Jiao G, Wei X, Tang A, Jianli W, Wu J, Zhunag J, Hu P. 2010. Mapping of qGL7-2, a grain length QTL on chromosome 7 of rice. *J Genet Genomics.* 37:523–531.
- Swamy BPM, Kaladhar K, Ramesha MS, Viraktamath BC, Sarla N. 2011. Molecular mapping of QTLs for yield and yield-related traits in *Oryza sativa* cv Swarna × *O. nivara* (IRGC81848) backcross population. *Rice Sci.* 18:178–186.
- Swamy BPM, Sarla N. 2008. Yield enhancing QTLs from wild species. *Biotechnol Adv.* 26:106–120.
- Swamy BPM, Sarla N. 2011. Meta-analysis of yield QTLs derived from inter-specific crosses of rice reveals consensus regions and candidate genes. *Plant Mol Biol Rep.* 29:663–680.
- Tan YF, Li JX, Xing YZ, Xu CG, Zhang Q. 1999. The three important traits for cooking and eating quality of rice grains are controlled by a single locus in an elite rice hybrid, Shanyou 63. *Theor Appl Genet.* 99:642–648.
- Tan YF, Sun M, Xing YZ, Hua JP, Sun XL, Zhang QF, Corke H. 2000. Mapping quantitative trait loci for milling quality, protein content and color characteristics of rice using a recombinant inbred line population derived from an elite rice hybrid. *Theor Appl Genet.* 103:1037–1045.
- Thomson MJ, Tai TH, McClung AM, Lai XH, Hinga ME, Lobos KB, Xu Y, Martinez CP, McCouch SR. 2003. Mapping quantitative trait loci for yield, yield components, and morphological traits in an advanced backcross population between *Oryza rufipogon* and the *Oryza sativa* cultivar Jefferson. *Theor Appl Genet.* 107:479–493.
- Tian R, Jiang GH, Shen LH, Wang LQ, He YQ. 2005. Mapping quantitative trait loci underlying the cooking and eating quality of rice using a DH population. *Mol Breed.* 15:117–124.
- Wan XY, Wan JM, Jiang L, Wang JK, Zhai HQ, Weng JF, Wang HL, Lei CL, Wang JL, Zhang X, et al. 2006. QTL analysis for rice grain length and fine mapping of an identified QTL with stable and major effects. *Theor Appl Genet.* 112:1258–1270.
- Wang LQ, Liu WJ, Xu Y, He YQ, Luo LJ, Xing YZ, Xu CG, Zhnag Q. 2007. Genetic basis of 17 traits and viscosity parameters characterizing the eating and cooking quality of rice grain. *Theor Appl Genet.* 115:463–476.
- Yan CJ, Xu CW, Yi CD, Liang GH, Zhu LH, Gu MH. 2001. Genetic analysis of gelatinization temperature in rice via microsatellite (SSR) markers. *Acta Genet Sin.* 33:1–5.
- Yongmei G, Ping M, Jiafu L, Yixuan L, Zichao L. 2007. QTL mapping and Q × E interactions of grain cooking and nutrient qualities in rice under upland and lowland environments. *Acta Genet Sin.* 34:420–428.
- Yuan PR, Kim HJ, Chen QH, Ju HG, Ji SD, Ahn SN. 2010. Mapping QTLs for grain quality using an introgression line population from a cross between *Oryza sativa* and *O. rufipogon*. *J Crop Sci Biotechnol.* 13:205–212.
- Zeng ZB. 1994. Precision mapping of quantitative trait loci. *Genetics.* 136:1457–1468.
- Zheng K, Subudhi PK, Domngo J, Magpantay G, Huang N. 1995. Rapid DNA isolation for marker assisted selection in rice breeding. *Rice Genet Newsl.* 12:255–268.
- Zheng X, Wu JG, Lou XY, Xu HM, Shi CH. 2008. The QTL analysis on maternal and endosperm genome and their environmental interactions for characters of cooking quality in rice (*Oryza sativa* L.). *Theor Appl Genet.* 116:335–342.
- Zhou LJ, Jiang L, Lui X, Chen H, Chen LM, Lui SJ, Wan JM. 2009. Mapping and interaction of QTLs for thousand-grain weight and percentage of grains with chalkiness in rice. *Acta Agron Sin.* 35:255–261.
- Zhou PH, Tan YF, He YQ, Xu CG, Zhang Q. 2003. Simultaneous improvement for four quality traits of Zhenshan 97, an elite parent of hybrid rice, by molecular marker-assisted selection. *Theor Appl Genet.* 106:326–333.

Received July 14, 2010; Revised November 22, 2011;  
Accepted November 22, 2011

Corresponding Editor: Perry Gustafson
